# Supplementary material for: SIN3 is critical for stress resistance and modulates adult lifespan
Source: publisher site journal article supplement (doi:10.18632/aging.100684), 2014-08-07
Supplement: Supplementary file [file aging-v6i8-100684-supplementary-material-SD1.pdf]

**SUPPLEMENTAL DATA**

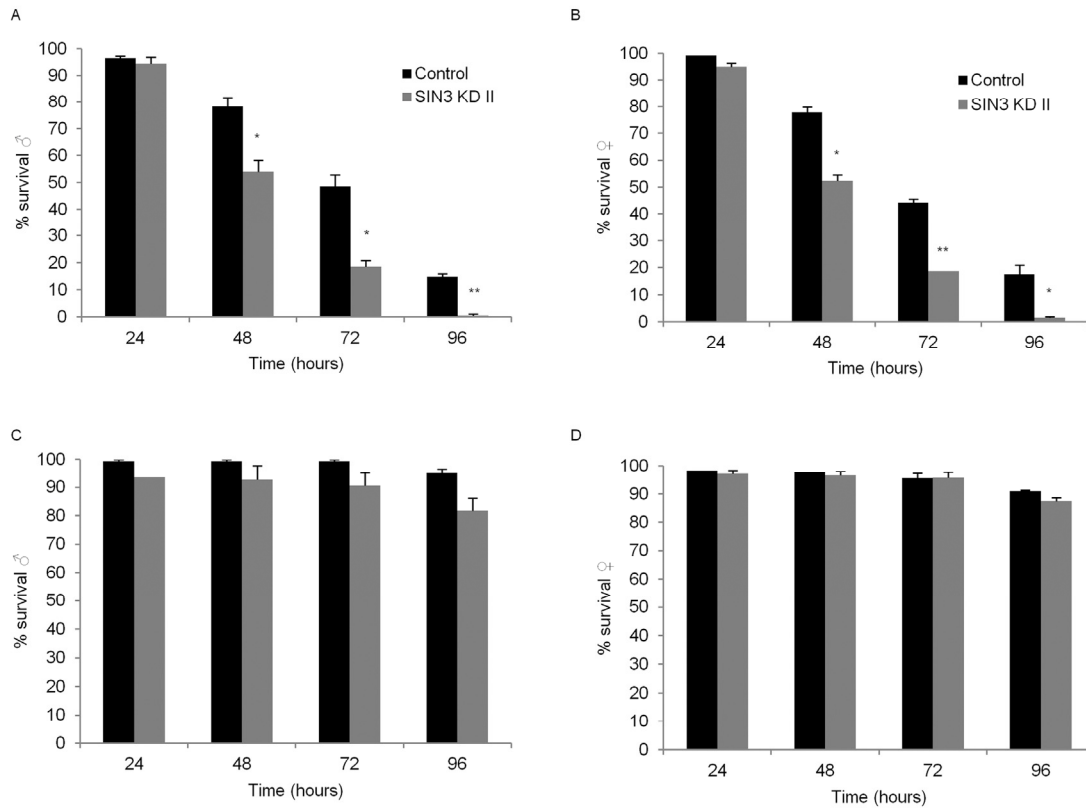

**Supplemental Figure 1.** (A, B) Ubiquitous *Sin3A* knockdown (KD II) results in greater sensitivity to paraquat. Survival of control (-RU486) or SIN3 KD II (+RU486) flies on 3 mM paraquat is indicated. (C, D) *Sin3A* knockdown (SIN3 KD II) does not significantly affect survival on 5% sucrose (0 mM paraquat). Error bars standard error of the mean. \* p<0.01, \*\* p<0.001.

**Supplemental Table 1.** Primer pairs used in this study

| Gene           | Forward primer sequence 5' -> 3' | Reverse primer sequence 5' -> 3' |
|----------------|----------------------------------|----------------------------------|
| <i>Sin3A</i>   | TTGCTCCAATGCTGTTCGC              | GGTTGGCGAATCCTGCGCTC             |
| <i>Taf1</i>    | GTGGAGGAGCCAAGGGAGCC             | TCCCGCTCCTTGTGCGAATG             |
| <i>Pgk</i>     | CCCCCGGTGTCTTTGAG                | GCCGTCCATGATGGACTTG              |
| <i>Tor</i>     | ACTGGAGACTGTTGGATGTGGAC          | GCTGTAGAGTCGGATCGTAGG            |
| <i>S6k</i>     | CGCTGCTGTTCTGTCTGTACTG           | GGCGAGTGCATTCTGTTTGG             |
| <i>4E-BP</i>   | GCTAAGATGTCCGCTTCACC             | CCCGCTCGTAGATAAGTTTGG            |
| <i>Foxo</i>    | AGCAGCAGCAACAGCAACAG             | GCCAGCGGTATATTGATGTCCAG          |
| <i>Sir2</i>    | CAATAAGGAGCAGAGCGTGATG           | TTCAGCGAGGAGCCGATCAC             |
| <i>Cat</i>     | GCCTGTCTCTCTGCTGTCC              | GGCTGGCGTTGCTCAAATGG             |
| <i>Sod</i>     | AACATCACCGACTCCAAGATTACG         | CAATAACGCCGCACCCGATG             |
| <i>Gclc</i>    | CTCACCACGGAATCCTGC               | GCTAATCACCGGCCAC                 |
| <i>Gclm</i>    | CATCCGTCCTTCTCCG                 | GCGTGGTGGTTGAAAAGG               |
| <i>GS</i>      | GGGCCAGTCCAAGGAGTT               | TCGTAGCCAGCTCGGAAG               |
| <i>CG32495</i> | GCGCAAGGAGTTCGAAA                | AGATTGGCCGTGAACTCG               |

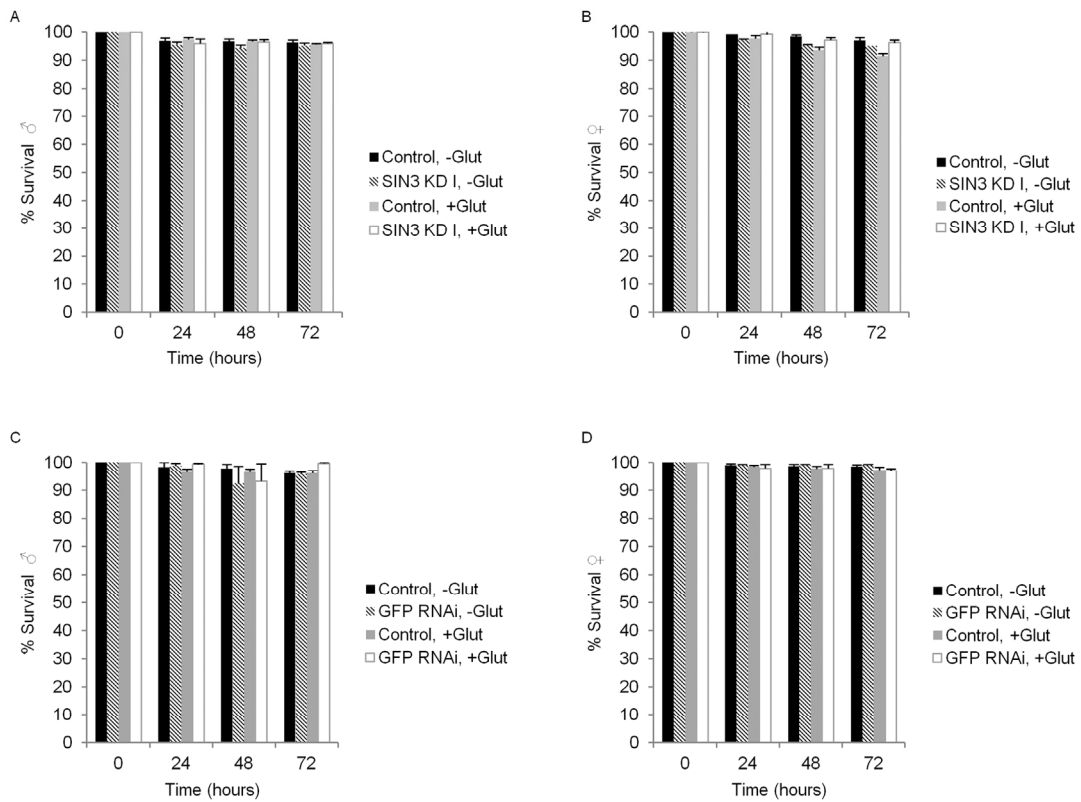

**Supplemental Figure 2.** *Sin3A* knockdown (KD I) does not affect survival on 5% sucrose with or without glutathione supplementation. Survival of control (-RU486), SIN3 KD I or GFP RNAi (+RU486) flies with the addition of 0.22 Mm glutathione (+Glut) or no glutathione (-Glut) on 5% sucrose (0 mM paraquat) is indicated. Error bars standard error of the mean. **A** and **B** SIN3 KD I; **C** and **D** GFP RNAi serves as additional control.
